# Supplementary material for: Age- and sex- specific dose coefficients to convert the ingested 90 Sr activity into cumulative dose in active marrow
Source: Research Square preprint supplement (doi:10.21203/rs.3.rs-7408276/v1), 2025-10-01
Supplement: Supplementary file 1 [file ad312a191be4209ef3800de9.docx]

**SI1. Segment-specific, site-specific and skeletal-average dose factors calculated for newborns, 1-year, 5-year, 10-year, 15-year-old children (male and female), and adults (male and female)**

Supplementary information for the paper “Age- and sex- specific dose coefficients to convert the ingested 90Sr activity into cumulative dose in active marrow”

Journal: Radiation and Environmental Biophysics

Authors: Shishkina1 E.A., Tolstykh1 E.I., Sharagin1 P.A., Smith2 M.A., Napier2 B.A.

Affiliation:

1 South Ural Scientific and Clinical Center for Medical Biophysics of FMBA, Chelyabinsk, Russia;

2 Pacific Northwest National Laboratory, Richland, WA, USA

Corresponding author: Elena Shishkina, elenaa.shishkina@gmail.com

Table 1*. DF*×10-11 (Gy/s) per (Bq/g) of computational phantom of 0-years old

| Site | Segment | DF(AM←TBV) | DF(AM←CBV) |
| --- | --- | --- | --- |
| Clavicle | Shaft | 3.60 | 4.70 |
| Sternal end | 4.32 | 1.08 |
| **Total clavicle** | | **3.93** | **2.76** |
| Femur | Distal end | 7.01 | 0.55 |
| Proximal end | 6.95 | 1.20 |
| Shaft | 5.28 | 6.88 |
| **Total femur** | | **6.83** | **1.42** |
| Hand and foot | Precarpal | 3.66 | 1.31 |
| Tube bones | 2.58 | 1.69 |
| **Total hand and foot** | | **2.86** | **1.59** |
| Humerus | Distal end | 4.69 | 1.30 |
| Proximal end | 4.85 | 1.15 |
| Shaft | 3.63 | 6.21 |
| **Total humerus** | | **4.55** | **2.21** |
| Pelvis | Ilium part 1 | 4.68 | 3.63 |
| Ilium part 2 | 5.18 | 1.04 |
| Ischium | 5.60 | 0.70 |
| Pubis | 5.65 | 1.52 |
| **Total pelvis** | | **5.21** | **1.78** |
| Radius and ulna | End | 2.09 | 6.23 |
| Shaft | 3.25 | 1.85 |
| **Total radius and ulna** | | **2.66** | **4.09** |
| Ribs | Ribs | 2.40 | 2.91 |
| **Total ribs** | | **2.40** | **2.91** |
| Sacrum | Body 1 | 7.18 | 0.00 |
| Body 2 | 6.86 | 0.00 |
| Body 3 | 6.45 | 0.00 |
| Body 4 | 5.90 | 0.00 |
| Body 5 | 5.46 | 0.00 |
| **Total sacrum** | | **6.74** | **0.00** |
| Scapula | Acromion | 5.13 | 1.54 |
| Body | 3.83 | 2.75 |
| Glenoid | 4.79 | 1.37 |
| **Total scapula** | | **4.50** | **2.07** |
| Skull | Flat bones | 6.25 | 0.00 |
| **Total skull** | | **6.25** | **0.00** |
| Tibia and fibula | Distal end | 6.56 | 0.83 |
| Fibula shaft | 5.01 | 5.68 |
| Proximal end | 6.74 | 0.78 |
| Tibia shaft | 2.77 | 5.57 |
| **Total tibia and fibula** | | **6.51** | **1.27** |
| Cervical vertebra | C-body | 6.97 | 0.00 |
| **Total cervical vertebra** | | **6.97** | **0.00** |
| Lumbar vertebra | L-body | 6.70 | 0.00 |
| **Total lumbar vertebra** | | **6.70** | **0.00** |
| Thoracic vertebra | T-body | 7.24 | 0.00 |
| **Total thoracic vertebra** | | **7.24** | **0.00** |
| **Total skeleton** | | **5.45** | **1.03** |

Table 2. DF×10-11 (Gy/s) per (Bq/g) of computational phantom of 1-year old

| Site | Segment | DF(AM←TBV) | DF(AM←CBV) |
| --- | --- | --- | --- |
| Clavicle | Acromial end | 4.55 | 1.51 |
| Shaft | 4.16 | 4.55 |
| Sternal end | 4.81 | 1.14 |
| **Total clavicle** | | **4.42** | **2.99** |
| Femur | Distal end | 4.84 | 1.05 |
| Proximal end | 4.56 | 1.18 |
| Shaft | 3.88 | 4.93 |
| **Total femur** |  | **4.60** | **1.60** |
| Humerus | Distal end | 4.12 | 1.19 |
| Proximal end | 4.33 | 1.04 |
| Shaft | 3.64 | 4.82 |
| **Total humerus** | | **4.10** | **2.05** |
| Pelvis | Ilium acetabular part | 4.76 | 0.75 |
| Ilium flat part 1 | 3.95 | 3.04 |
| Ilium flat part 2 | 4.18 | 1.55 |
| Ischium acetabular part | 4.43 | 1.27 |
| Ischium tuberosity | 4.51 | 0.94 |
| Pubic ramus superior | 3.64 | 1.02 |
| Pubis acetabular part | 4.35 | 1.73 |
| **Total pelvis** | | **4.31** | **1.62** |
| Radius and ulna | End | 2.50 | 2.01 |
| Shaft | 1.93 | 6.33 |
| **Total radius and ulna** | | **2.15** | **4.63** |
| Ribs | Ribs | 4.07 | 3.09 |
| **Total ribs** | | **4.07** | **3.09** |
| Sacrum | Ala 1 | 2.58 | 0.00 |
| Ala 2 | 2.43 | 0.00 |
| Ala 3 | 2.37 | 0.00 |
| Ala 4 | 2.06 | 0.00 |
| Body | 2.79 | 0.00 |
| Body | 2.66 | 0.00 |
| Body | 2.46 | 0.00 |
| Body | 2.39 | 0.00 |
| Body | 2.12 | 0.00 |
| **Total sacrum** | | **2.55** | **0.00** |
| Scapula | Acromion | 3.95 | 1.59 |
| Body | 2.95 | 2.67 |
| Glenoid | 3.77 | 0.99 |
| **Total scapula** | | **3.46** | **1.95** |
| Skull | Flat bones | 5.70 | 4.62 |
| **Total skull** | | **5.70** | **4.62** |
| Tibia and fibula | Distal end | 4.06 | 1.26 |
| Fibula shaft | 2.00 | 7.70 |
| Proximal end | 4.22 | 1.13 |
| Tibia shaft | 2.91 | 6.82 |
| **Total tibia and fibula** | | **4.00** | **1.84** |
| Cervical vertebra | Cervical vertebra body | 3.31 | 0.00 |
| **Total cervical vertebra** | | **3.31** | **0.00** |
| Lumbar vertebra | Lumbar vertebra body | 2.60 | 0.00 |
| **Total lumbar vertebra** | | **2.60** | **0.00** |
| Thoracic vertebra | Thoracic vertebra body | 2.57 | 0.00 |
| **Total thoracic vertebra** | | **2.57** | **0.00** |
| **Total skeleton** | | **4.23** | **2.39** |

Table 3. DF×10-11 (Gy/s) per (Bq/g) of computational phantom of 5-years old

| Site | Segment | DF(AM←TBV) | DF(AM←CBV) |
| --- | --- | --- | --- |
| Clavicle | Acromial end | 2.50 | 4.62 |
| Shaft | 5.64 | 1.19 |
| Sternal end | 5.35 | 1.62 |
| **Total clavicle** | | **4.03** | **2.98** |
| Femur | Distal end | 5.33 | 0.94 |
| Lower proximal end | 7.13 | 1.28 |
| Shaft | 5.00 | 3.74 |
| Upper proximal end | 7.13 | 1.27 |
| **Total femur** | | **5.73** | **1.53** |
| Humerus | Distal end | 4.56 | 1.11 |
| Proximal end | 4.56 | 1.02 |
| Shaft | 4.28 | 3.51 |
| **Total humerus** | | **4.48** | **1.76** |
| Pelvis | Ilium acetabular part | 5.33 | 0.86 |
| Ilium flat part 1 | 4.97 | 2.31 |
| Ilium flat part 2 | 5.25 | 1.33 |
| Ischial ramus inferior | 5.10 | 1.72 |
| Ischium acetabular part | 5.33 | 1.00 |
| Ischium tuberosity | 5.00 | 1.62 |
| Pubis acetabular part | 4.83 | 0.96 |
| Pubis ramus inferior | 4.69 | 1.89 |
| Pubis ramus superior | 5.00 | 1.62 |
| **Total pelvis** | | **5.13** | **1.55** |
| Radius and ulna | End | 3.18 | 1.86 |
| Shaft | 2.81 | 5.18 |
| **Total radius and ulna** | | **2.94** | **4.02** |
| Ribs | Ribs | 3.11 | 3.11 |
| **Total ribs** | | **3.11** | **3.11** |
| Sacrum | Body-ala 1 | 2.93 | 0.43 |
| Body-ala 2 | 3.14 | 0.68 |
| Body-ala 3 | 2.99 | 1.01 |
| Body-ala 4 | 2.69 | 1.77 |
| Body-ala 5 | 2.58 | 1.74 |
| **Total sacrum** | | **2.97** | **0.67** |
| Scapula | Acromion | 4.56 | 1.22 |
| Glenoid | 4.12 | 2.47 |
| Lateral margin | 3.03 | 5.03 |
| **Total scapula** | | **4.18** | **2.21** |
| Skull | Flat bones | 7.30 | 4.23 |
| **Total skull** | | **7.30** | **4.23** |
| Sternum | Sternum | 3.63 | 0.56 |
| **Total sternum** | | **3.63** | **0.56** |
| Tibia and fibula | Distal end | 5.33 | 0.98 |
| Fibula body | 4.67 | 5.31 |
| Proximal end | 5.29 | 0.79 |
| Tibia shaft | 5.24 | 0.42 |
| **Total tibia and fibula** | | **5.22** | **1.20** |
| Cervical vertebra | C-body | 3.99 | 0.39 |
| **Total cervical vertebra** | | **3.99** | **0.39** |
| Lumbar vertebra | L-body | 3.14 | 0.27 |
| L-spinous process | 2.62 | 1.08 |
| L-transverse process | 2.50 | 1.23 |
| **Total lumbar vertebra** | | **3.06** | **0.39** |
| Thoracic vertebra | T-body | 3.01 | 0.40 |
| T-spinous process | 2.04 | 1.81 |
| T-transverse process | 2.58 | 1.36 |
| **Total thoracic vertebra** | | 2.88 | 0.64 |
| **Total skeleton** | | **4.70** | **1.98** |

Table 4. DF×10-11 (Gy/s) per (Bq/g) of computational phantom of 10-years old

| Site | Segment | DF(AM←TBV) | DF(AM←CBV) |
| --- | --- | --- | --- |
| Clavicle | Acromial end | 5.77 | 1.95 |
| Body | 2.68 | 5.42 |
| Sternal end | 6.03 | 1.43 |
| **Total clavicle** | | **4.52** | **3.27** |
| Femur | Distal end | 5.61 | 0.73 |
| Lower proximal end | 7.24 | 1.48 |
| Upper proximal end | 7.24 | 1.38 |
| **Total femur** | | **5.99** | **0.89** |
| Humerus | Distal end | 4.83 | 0.96 |
| Proximal end | 4.63 | 1.00 |
| **Total humerus** | | **4.72** | **0.98** |
| Pelvis | Ilium acetabular part | 5.03 | 0.43 |
| Ilium flat part 1 | 5.02 | 2.51 |
| Ilium flat part 2 | 5.16 | 1.86 |
| Ischium acetabular part | 5.41 | 1.01 |
| Ischium tuberosity | 5.41 | 0.90 |
| Ischial ramus inferior | 5.10 | 1.37 |
| Pubis acetabular part | 5.17 | 0.83 |
| Pubis ramus superior | 5.35 | 1.37 |
| Pubis ramus inferior | 5.10 | 1.64 |
| **Total pelvis** | | **5.16** | **1.47** |
| Ribs | Ribs | 3.24 | 3.83 |
| **Total ribs** | | **3.24** | **3.83** |
| Sacrum | Body-ala 1 | 3.19 | 1.02 |
| Body-ala 2 | 2.98 | 1.02 |
| Body-ala 3 | 3.07 | 1.49 |
| Body-ala 4 | 2.77 | 2.05 |
| Body-ala 5 | 2.87 | 2.04 |
| **Total sacrum** | | **3.09** | **1.17** |
| Skull | Flat bones | 7.33 | 4.91 |
| **Total skull** | | **7.33** | **4.91** |
| Scapula | Acromion | 4.34 | 2.32 |
| Glenoid | 4.83 | 1.09 |
| Lateral margin | 3.43 | 4.37 |
| **Total scapula** | | **4.44** | **2.03** |
| Sternum | Sternum | 3.34 | 1.37 |
| **Total sternum** | | **3.34** | **1.37** |
| Tibia and fibula | Distal end | 5.38 | 0.80 |
| Fibula ends | 4.68 | 3.87 |
| Proximal end | 5.38 | 0.58 |
| **Total tibia and fibula** | | **5.33** | **0.88** |
| Vertebra | C-body | 4.29 | 0.36 |
| **Total vertebra** | | **4.29** | **0.36** |
| Lumbar vertebra | L-body | 3.19 | 0.24 |
| L-spinous process | 2.78 | 1.15 |
| L-transverse process | 2.45 | 1.32 |
| **Total lumbar** **vertebra** | | **3.09** | **0.43** |
| Thoracic vertebra | T-body | 2.98 | 0.30 |
| T-spinous process | 2.33 | 1.54 |
| T-transverse process | 2.70 | 1.13 |
| **Total thoracic vertebra** | | **2.88** | **0.52** |
| **Total skeleton** | | **4.60** | **1.82** |

Table 5. DF×10-11 (Gy/s) per (Bq/g) of computational phantom of 15-years old male

| Site | Segment | DF(AM←TBV) | DF(AM←CBV) |
| --- | --- | --- | --- |
| Clavicle | Acromial end | 6.14 | 1.64 |
| Shaft | 3.01 | 3.88 |
| Sternal end | 6.22 | 1.17 |
| **Total clavicle** | | **4.54** | **2.66** |
| Femur | Neck | 7.32 | 0.94 |
| Trochanter area | 5.47 | 0.78 |
| **Total femur** | | **5.99** | **0.82** |
| Humerus | Proximal end | 4.88 | 0.69 |
| **Total humerus** | | **4.88** | **0.69** |
| Pelvis | Acetabulum | 5.47 | 0.53 |
| Iliac ala | 5.38 | 0.94 |
| Iliac crest | 5.30 | 1.63 |
| Iliac dorsal segment | 5.28 | 0.84 |
| Ischium ramus | 5.39 | 1.42 |
| Pubis ramus inferior | 5.47 | 1.15 |
| Pubis ramus superior (Low) | 5.28 | 0.69 |
| Pubis ramus superior (Upper) | 4.94 | 2.30 |
| **Total pelvis** | | **5.35** | **0.98** |
| Ribs | 1, 2 | 2.56 | 2.70 |
| 11, 12 | 2.61 | 2.48 |
| 3, 4, 9, 10 | 2.56 | 2.89 |
| 5,6,7,8 | 2.32 | 3.31 |
| **Total ribs** | | **2.56** | **2.70** |
| Sacrum | Ala 3-4 | 3.02 | 2.46 |
| Body 1 | 3.23 | 0.62 |
| Body 2-3 | 3.23 | 1.07 |
| Body 4-5 | 3.23 | 1.84 |
| Pedicle 1 | 3.23 | 2.00 |
| Pedicle 2 | 3.05 | 2.10 |
| Pedicle 3 | 2.89 | 2.64 |
| Pedicle 4 | 3.23 | 0.95 |
| Sacral ala 1 | 3.23 | 0.91 |
| Sacral ala 2 | 3.06 | 2.08 |
| **Total sacrum** | | **3.20** | **1.16** |
| Scapula | Acromion | 4.82 | 0.98 |
| Glenoid | 4.44 | 2.11 |
| Lateral margin | 3.44 | 4.39 |
| **Total scapula** | | **4.51** | **1.82** |
| Skull | Flat bones | 8.04 | 4.57 |
| **Total skull** | | **8.04** | **4.57** |
| Sternum | Sternum | 3.39 | 1.19 |
| **Total sternum** | | **3.39** | **1.19** |
| Cervical vertebra | C1 mass | 4.81 | 3.39 |
| C2-body | 4.96 | 0.40 |
| C3-7 body | 4.43 | 0.62 |
| **Total cervical vertebra** | | **4.61** | **1.02** |
| Lumbar vertebra | L- body | 3.01 | 0.36 |
| L-lamina+inferior process | 2.03 | 5.37 |
| L-transverse process | 2.61 | 2.23 |
| L-spinous process | 2.85 | 1.93 |
| L-superior process | 3.14 | 1.41 |
| **Total lumbar** **vertebra** | | **2.96** | **0.86** |
| Thoracic vertebra | T-body | 3.01 | 0.50 |
| T-lamina+inferior process | 2.89 | 6.55 |
| T-transverse process | 2.78 | 1.77 |
| T-spinous process | 2.54 | 2.49 |
| T-superior process | 1.96 | 7.50 |
| **Total thoracic** **vertebra** | | **2.91** | **1.43** |
| **Total skeleton** | | **4.43** | **1.67** |

Table 6. DF×10-11 (Gy/s) per (Bq/g) of computational phantom of 15-years old female

| Site | Segment | DF(AM←TBV) | DF(AM←CBV) |
| --- | --- | --- | --- |
| Clavicle | Acromial end | 5.89 | 1.93 |
| Shaft | 2.78 | 4.97 |
| Sternal end | 5.74 | 1.18 |
| **Total clavicle** | | **4.48** | **2.98** |
| Femur | Neck | 7.32 | 1.28 |
| Trochanter area | 5.47 | 0.90 |
| **Total femur** | | **5.96** | **1.00** |
| Humerus | Proximal end | 4.88 | 0.75 |
| **Total humerus** | | **4.88** | **0.75** |
| Pelvis | Acetabulum | 5.47 | 0.53 |
| Iliac ala | 5.38 | 0.94 |
| Iliac crest | 5.30 | 1.63 |
| Iliac dorsal segment | 5.28 | 0.84 |
| Ischium ramus | 5.28 | 1.13 |
| Pubis ramus inferior | 5.43 | 1.08 |
| Pubis ramus superior (Low) | 5.28 | 0.69 |
| Pubis ramus superior (Upper) | 4.94 | 2.30 |
| **Total pelvis** | | **5.33** | **0.93** |
| Ribs | 1, 2 | 2.39 | 3.43 |
| 11, 12 | 2.53 | 2.98 |
| 3, 4, 9, 10 | 2.36 | 3.28 |
| 5,6,7,8 | 1.98 | 4.72 |
| **Total ribs** | | **2.42** | **3.23** |
| Sacrum | Ala 3-4 | 2.95 | 2.22 |
| Body 1 | 3.23 | 0.66 |
| Body 2-3 | 3.23 | 1.15 |
| Body 4-5 | 3.23 | 1.84 |
| Pedicle 1 | 3.23 | 2.00 |
| Pedicle 2 | 3.05 | 2.10 |
| Pedicle 3 | 2.89 | 2.64 |
| Pedicle 4 | 3.23 | 0.98 |
| Sacral ala 1 | 3.23 | 0.97 |
| Sacral ala 2 | 3.06 | 2.08 |
| **Total sacrum** | | **3.19** | **1.20** |
| Scapula | Acromion | 4.82 | 0.98 |
| Glenoid | 4.44 | 2.11 |
| Lateral margin | 3.44 | 4.39 |
| **Total scapula** | | **4.51** | **1.82** |
| Skull | Flat bones | 8.04 | 4.57 |
| **Total skull** | | **8.04** | **4.57** |
| Sternum | Sternum | 3.39 | 1.19 |
| **Total sternum** | | **3.39** | **1.19** |
| Cervical vertebra | C1 mass | 5.54 | 3.39 |
| C2-body | 4.96 | 0.40 |
| C3-7 body | 4.43 | 0.62 |
| **Total cervical vertebra** | | **4.73** | **1.02** |
| Lumbar vertebra | L- body | 3.01 | 0.36 |
| L-lamina+inferior process | 2.03 | 5.37 |
| L-transverse process | 2.61 | 2.23 |
| L-spinous process | 2.85 | 1.93 |
| L-superior process | 3.14 | 1.41 |
| **Total lumbar** **vertebra** | | **2.96** | **0.86** |
| Thoracic vertebra | T-body | 3.01 | 0.50 |
| T-lamina+inferior process | 2.89 | 6.55 |
| T-transverse process | 2.78 | 1.77 |
| T-spinous process | 2.54 | 2.49 |
| T-superior process | 1.96 | 7.50 |
| **Total thoracic** **vertebra** | | **2.91** | **1.43** |
| **Total skeleton** | | **4.40** | **1.76** |

Table 7. DF×10-11 (Gy/s) per (Bq/g) of computational phantom of adult male

| Site | Segment | DF(AM←TBV) | DF(AM←CBV) |
| --- | --- | --- | --- |
| Clavicle | Acromial shaft | 7.37 | 0.87 |
| Ends | 2.98 | 2.13 |
| Sternal shaft | 2.81 | 3.11 |
| **Total clavicle** | | **5.00** | **1.72** |
| Femur | Neck | 4.05 | 1.09 |
| Trochanter area | 2.69 | 0.87 |
| **Total femur** | | **3.09** | **0.93** |
| Humerus | Proximal end | 1.64 | 0.82 |
| **Total humerus** |  | **1.64** | **0.82** |
| Pelvis | Acetabulum | 4.63 | 0.80 |
| Iliac ala | 4.31 | 1.78 |
| Iliac crest | 4.34 | 1.83 |
| Iliac dorsal segment | 4.03 | 1.23 |
| Ischium ramus | 3.93 | 1.30 |
| Pubis ramus inferior | 5.58 | 1.04 |
| Pubis ramus superior (lower) | 5.82 | 0.73 |
| Pubis ramus superior (upper) | 3.88 | 2.54 |
| **Total pelvis** | | **4.66** | **1.31** |
| Ribs | 1, 2 | 2.56 | 2.70 |
| 11, 12 | 2.61 | 2.48 |
| 3, 4, 9, 10 | 2.56 | 2.89 |
| 5,6,7,8 | 2.32 | 3.31 |
| **Total ribs** | | **2.56** | **2.70** |
| Sacrum | Ala 3-4 | 3.51 | 3.31 |
| Body 1 | 3.94 | 0.67 |
| Body 2-3 | 3.81 | 1.35 |
| Body 4-5 | 3.54 | 2.06 |
| Pedicle 1 | 3.59 | 2.25 |
| Pedicle 2 | 3.41 | 2.56 |
| Pedicle 3 | 3.24 | 3.24 |
| Pedicle 4 | 3.90 | 0.93 |
| Sacral ala 1 | 3.79 | 1.11 |
| Sacral ala 2 | 3.57 | 2.51 |
| **Total sacrum** | | **3.79** | **1.33** |
| Scapula | Acromion | 4.82 | 0.98 |
| Glenoid | 4.44 | 2.11 |
| Lateral margin | 3.43 | 4.39 |
| **Total scapula** | | **4.52** | **1.79** |
| Skull | Flat bones | 9.64 | 3.95 |
| **Total skull** | | **9.64** | **3.95** |
| Sternum | Body | 3.48 | 1.80 |
| Manubrium | 3.57 | 1.57 |
| **Total sternum** | | **3.51** | **1.71** |
| **Cervical** **vertebra** | C- body 3-7 | 4.89 | 0.65 |
| Cervical body 2 | 4.96 | 0.40 |
| Cervical lateral 1 | 4.81 | 3.39 |
| **Total cervical vertebra** | | **4.89** | **1.01** |
| Lumbar vertebra | L-body | 3.93 | 0.38 |
| L-lamina+inferior process | 2.03 | 5.37 |
| L-spinous process | 2.89 | 1.86 |
| L-superior process | 3.14 | 1.41 |
| L-transverse process | 3.25 | 1.75 |
| **Total lumbar** **vertebra** | | **3.67** | **0.82** |
| Thoracic **v**ertebra | T-body | 4.25 | 0.51 |
| T-lamina+inferior | 2.89 | 6.55 |
| T-spinous process | 2.23 | 7.14 |
| T-superior process | 1.96 | 7.50 |
| T-transverse process | 2.84 | 3.14 |
| **Total thoracic vertebra** | | **3.92** | **1.41** |
| **Total skeleton** | | **4.20** | **1.54** |

Table 8. DF×10-11 (Gy/s) per (Bq/g) of computational phantom of adult female

| Site | Segment | DF(AM←TBV) | DF(AM←CBV) |
| --- | --- | --- | --- |
| Clavicle | Acromial shaft | 6.34 | 0.92 |
| Ends | 2.98 | 2.17 |
| Sternal shaft | 2.81 | 3.21 |
| **Total clavicle** | | **4.61** | **1.74** |
| Femur | Neck | 4.26 | 1.46 |
| Trochanter area | 2.69 | 0.96 |
| **Total femur** | | **3.13** | **1.10** |
| Humerus | Proximal end | 1.50 | 0.70 |
| **Total humerus** | | **1.50** | **0.70** |
| Pelvis | Acetabulum | 4.63 | 0.80 |
| Iliac ala | 4.31 | 1.78 |
| Iliac crest | 4.34 | 1.83 |
| Iliac dorsal segment | 4.03 | 1.65 |
| Ischium ramus | 4.05 | 1.09 |
| Pubis ramus inferior | 5.58 | 1.04 |
| Pubis ramus superior (lower) | 5.53 | 0.55 |
| Pubis ramus superior (upper) | 3.88 | 2.54 |
| **Total pelvis** | | **4.73** | **1.21** |
| Ribs | 1, 2 | 2.39 | 3.43 |
| 11, 12 | 2.53 | 2.98 |
| 3, 4, 9, 10 | 2.36 | 3.28 |
| 5,6,7,8 | 1.98 | 4.72 |
| **Total ribs** | | **2.42** | **3.23** |
| Sacrum | Ala 3-4 | 3.60 | 2.71 |
| Body 1 | 3.60 | 0.78 |
| Body 2-3 | 3.60 | 0.99 |
| Body 4-5 | 3.54 | 2.06 |
| Pedicle 1 | 3.59 | 2.25 |
| Pedicle 2 | 3.41 | 2.56 |
| Pedicle 3 | 3.24 | 3.24 |
| Pedicle 4 | 3.60 | 1.13 |
| Sacral ala 1 | 3.60 | 1.14 |
| Sacral ala 2 | 3.60 | 2.51 |
| **Total sacrum** | | **3.59** | **1.36** |
| Scapula | Acromion | 4.82 | 0.98 |
| Glenoid | 4.44 | 2.11 |
| Lateral margin | 3.43 | 4.39 |
| **Total scapula** | | **4.52** | **1.79** |
| Skull | Flat bones | 9.64 | 3.95 |
| **Total skull** | | **9.64** | **3.95** |
| Sternum | Body | 3.29 | 2.03 |
| Manubrium | 3.35 | 1.89 |
| **Total sternum** | | **3.32** | **1.95** |
| **Cervical** **vertebra** | C- body 3-7 | 4.91 | 0.66 |
| Cervical body 2 | 4.96 | 0.40 |
| Cervical lateral 1 | 4.81 | 3.39 |
| **Total cervical vertebra** | | **4.90** | **1.10** |
| Lumbar vertebra | L-body | 3.60 | 0.39 |
| L-lamina+inferior process | 2.03 | 5.37 |
| L-spinous process | 3.15 | 1.88 |
| L-superior process | 3.14 | 1.41 |
| L-transverse process | 3.25 | 1.75 |
| **Total lumbar** **vertebra** | | **3.45** | **0.87** |
| Thoracic **v**ertebra | T-body | 3.83 | 0.52 |
| T-lamina+inferior process | 3.12 | 6.55 |
| T-spinous process | 2.23 | 7.14 |
| T-superior process | 2.12 | 7.50 |
| T-transverse process | 2.84 | 3.54 |
| **Total thoracic vertebra** | | **3.52** | **1.80** |
| **Total skeleton** | | **4.07** | **1.66** |
